# Supplementary material for: Multitarget-directed resveratrol derivatives: anti-cholinesterases, anti-β-amyloid aggregation and monoamine oxidase inhibition properties against Alzheimer's disease
Source: Royal Society of Chemistry journal article supplement (doi:10.1039/c3md00376k), 2014-01-01
Supplement: c3md00376k1.pdf [file c3md00376k1.pdf]

## Supplementary Information

**Multitarget-directed resveratrol derivatives: *anti*-cholinesterases, *anti*- $\beta$ -amyloid aggregation and monoamine oxidase inhibition properties against Alzheimer's disease**

Long-Fei Pan, Xiao-Bing Wang, Sai-Sai Xie, Su-Yi Li and Ling-Yi Kong \*

*State Key Laboratory of Natural Medicines, Department of Natural Medicinal Chemistry, China Pharmaceutical University, 24 Tong Jia Xiang, Nanjing 210009, People's Republic of China*

\*Corresponding Author

Tel/Fax: +86-25-8327-1405.

E-mail: [cpu\\_lykong@126.com](mailto:cpu_lykong@126.com)

## Experimental

### General

All common reagents and solvents were obtained from commercial suppliers and used without further purification. Reaction progress was monitored using analytical thin layer chromatography (TLC) on precoated silica gel GF<sub>254</sub> plates (Qingdao Haiyang Chemical Plant, Qingdao, China) plates and the spots were detected under UV light (254 nm). Column chromatography was performed on silica gel (90-150  $\mu$ m; Qingdao Marine Chemical Inc.) IR (KBr discs) spectra were recorded on a Bruker Tensor 27 spectrometer (Bruker, Karlsruhe, Germany). Melting point was measured on an XT-4 micromelting point instrument and uncorrected. <sup>1</sup>H NMR and <sup>13</sup>C NMR spectra were measured on a Bruker ACF-500 spectrometer at 25 °C and referenced to TMS. Chemical shifts are reported in ppm ( $\delta$ ) using the residual solvent line as internal standard. The purity of all compounds used for biological evaluation was confirmed to be higher than 97% through analytical HPLC performed with Agilent 1200 HPLC System. A Zorbax SB-C<sub>18</sub> column (4.6 mm  $\times$  250 mm, 5  $\mu$ m, Agilent, Inc.) was used. The mobile phase was 0.01% THF water solution (A) and MeOH (B) gradient system and the flow rate was 1.0 mL/min with the gradient: 0-20 min, 60% B to 90% B. Mass spectra were obtained on a MS Agilent 1100 Series LC/MSD Trap mass spectrometer (ESI-MS) and a Mariner ESI-TOF spectrometer (HRESI-MS), respectively.

### 1-(Bromomethyl)-3,5-dimethoxybenzene (2)

PBr<sub>3</sub> (1.8 ml) was added dropwise to a solution of (3,5-dimethoxyphenyl)methanol (3.26 g, 19.4 mmol) and pyridine (0.078 ml) in CH<sub>2</sub>Cl<sub>2</sub> at 0 °C. After the mixture was

slowly warmed to room temperature and stirred for 4 h, the reaction was quenched by the slowly addition of ice water, extracted with CH<sub>2</sub>Cl<sub>2</sub>, washed with brine, dried over Na<sub>2</sub>SO<sub>4</sub> and concentrated to provide 1-(bromomethyl)-3,5-dimethoxybenzene as white solid, yield 96%. <sup>1</sup>H NMR (500 MHz, MEOD) δ 6.57 (d, *J* = 2.5 Hz, 2H), 6.41 (t, *J* = 2.5 Hz, 1H), 4.48 (s, 2H), 3.77 (s, 6H); MS (ESI) *m/z* 230.0 [M+H]<sup>+</sup>.

### **Diethyl 3,5-dimethoxybenzylphosphonate (3)**

The mixture of **2** (2.17 g, 39.4 mmol) and triethyl phosphate (4.5 ml) were heated at 160 °C for 4 h. The excess triethyl phosphate was removed in vacuum to provide the crude product as a colorless oil, yield 95%. <sup>1</sup>H NMR (500 MHz, CDCl<sub>3</sub>): δ 6.46 (t, *J* = 2.5 Hz, 2H), 6.35 (d, *J* = 2.5 Hz, 1H), 4.05-4.02 (m, 4H), 3.77 (s, 6H), 3.09 (d, *J* = 21.0 Hz, 2H), 1.28 (t, *J* = 7.0 Hz, 6H); MS (ESI) *m/z* 288.0 [M+H]<sup>+</sup>.

### **General procedures for the preparation of intermediate (4a-g)**

To a stirred mixture of 4-hydroxybenzaldehyde (5 mmol) and K<sub>2</sub>CO<sub>3</sub> (1.4 g, 10 mmol) in acetonitrile (15 mL), α,ω-dibromoalkanes (25 mmol) was added. After stirred for 4 h at 40 °C, the mixture was filtered and the filtrate was evaporated under reduced pressure. The obtained residue was purified by silica gel chromatography with petroleum/ethyl acetate as an eluent to give compounds **4a-g**.

### **4-(2-Bromoethoxy)benzaldehyde (4a)**

4-Hydroxybenzaldehyde was treated with 1,2-dibromoethane according to the general procedure to give a crude product. Then it was purified using silica gel chromatography with petroleum ether/EtOAc (15:1, v/v) as elution solvent to obtain the desired product **4a** as a light yellow solid, yield 85.5%, mp 50-52 °C. <sup>1</sup>H NMR

(500 MHz, DMSO- $d_6$ )  $\delta$  9.91 (s, 1H), 7.90 (d,  $J$  = 8.5 Hz, 2H), 7.18 (d,  $J$  = 8.5 Hz, 2H), 4.47 (t,  $J$  = 5.5 Hz, 2H), 3.87 (t,  $J$  = 5.5 Hz, 2H); MS (ESI)  $m/z$  230.0 [M+H]<sup>+</sup>.

#### **4-(3-Bromopropoxy)benzaldehyde (4b)**

4-Hydroxybenzaldehyde was treated with 1,3-dibromopropane according to the general procedure to give a crude product. Then it was purified using silica gel chromatography with petroleum ether/EtOAc (30:1, v/v) as elution solvent to obtain the desired product **4b** as a light yellow solid, yield 88.6%, mp 31-32 °C. <sup>1</sup>H NMR (500 MHz, DMSO- $d_6$ )  $\delta$  9.90 (s, 1H) 7.99 (d,  $J$  = 8.5 Hz, 2H), 7.17 (d,  $J$  = 9.0 Hz, 2H), 4.23 (t,  $J$  = 6.0 Hz, 2H), 3.70 (t,  $J$  = 6.5 Hz, 2H), 2.34-2.28 (m, 2H); MS (ESI)  $m/z$  244.0 [M+H]<sup>+</sup>.

#### **4-(4-Bromobutoxy)benzaldehyde (4c)**

4-Hydroxybenzaldehyde was treated with 1,4-dibromobutane according to the general procedure to give a crude product. Then it was purified using silica gel chromatography with petroleum ether/EtOAc (20:1, v/v) as elution solvent to obtain the desired product **4c** as a light yellow solid, yield 86.0%, mp 32-34 °C. <sup>1</sup>H NMR (500 MHz, DMSO- $d_6$ )  $\delta$  9.89 (s, 1H), 7.88 (d,  $J$  = 8.5 Hz, 2H), 7.15 (d,  $J$  = 9.0 Hz, 2H), 4.16 (t,  $J$  = 6.5 Hz, 2H), 3.64 (t,  $J$  = 6.5 Hz, 2H), 2.03-1.95 (m, 2H), 1.92-1.86 (m, 2H); MS (ESI)  $m/z$  258.1 [M+H]<sup>+</sup>.

#### **4-((5-Bromopentyl)oxy)benzaldehyde (4d)**

4-Hydroxybenzaldehyde was treated with 1,5-dibromopentane according to the general procedure to give a crude product. Then it was purified using silica gel chromatography with petroleum ether/EtOAc (20:1, v/v) as elution solvent to obtain

the desired product **4d** as a white solid, yield 78.5%, mp 35-36 °C. <sup>1</sup>H NMR (500 MHz, DMSO-*d*<sub>6</sub>) δ 9.89 (s, 1H), 7.88 (d, *J* = 8.5 Hz, 2H), 7.14 (d, *J* = 9.0 Hz, 2H), 4.12 (t, *J* = 6.5 Hz, 2H), 3.58 (t, *J* = 6.5 Hz, 2H), 1.92-1.87 (m, 2H), 1.82-1.76 (m, 2H), 1.60-1.53 (m, 2H); MS (ESI) *m/z* 272.3 [M+H]<sup>+</sup>.

#### **4-((6-Bromohexyl)oxy)benzaldehyde (4e)**

4-Hydroxybenzaldehyde was treated with 1,6-dibromohexane according to the general procedure to give a crude product. Then it was purified using silica gel chromatography with petroleum ether/EtOAc (30:1, v/v) as elution solvent to obtain the desired product **4e** as a white solid, yield 76.6%, mp 39-40 °C. <sup>1</sup>H NMR (500 MHz, DMSO-*d*<sub>6</sub>) δ 9.88 (s, 1H), 7.88 (d, *J* = 9.0 Hz, 2H), 7.14 (d, *J* = 8.5 Hz, 2H), 4.11 (t, *J* = 6.5 Hz, 2H), 3.56 (t, *J* = 6.5 Hz, 2H), 1.88-1.75 (m, 4H), 1.48-1.46 (m, 4H); MS (ESI) *m/z* 284.4 [M-H]<sup>+</sup>.

#### **4-((7-Bromoheptyl)oxy)benzaldehyde (4f)**

4-Hydroxybenzaldehyde was treated with 1,7-dibromohexane according to the general procedure to give a crude product. Then it was purified using silica gel chromatography with petroleum ether/EtOAc (20:1, v/v) as elution solvent to obtain the desired product **4f** as a pale yellow solid, yield 74.3%, mp 42-42 °C. <sup>1</sup>H NMR (500 MHz, DMSO-*d*<sub>6</sub>) δ 9.88 (s, 1H), 7.88 (d, *J* = 9.0 Hz, 2H), 7.14 (d, *J* = 9.0 Hz, 2H), 4.11 (t, *J* = 6.5 Hz, 2H), 3.56 (t, *J* = 6.5 Hz, 2H), 1.86-1.75 (m, 4H), 1.48-1.29 (m, 6H); MS (ESI) *m/z* 299.1 [M+H]<sup>+</sup>.

#### **4-((8-Bromooctyl)oxy)benzaldehyde (4g)**

4-Hydroxybenzaldehyde was treated with 1,8-dibromohexane according to the

general procedure to give a crude product. Then it was purified using silica gel chromatography with petroleum ether/EtOAc (15:1, v/v) as elution solvent to obtain the desired product **4g** as a pale yellow solid, yield 72.4%, mp 46-48 °C. <sup>1</sup>H NMR (500 MHz, DMSO-*d*<sub>6</sub>) δ 9.88 (s, 1H), 7.88 (d, *J* = 9.0 Hz, 2H), 7.14 (d, *J* = 9.0 Hz, 2H), 4.11 (t, *J* = 6.5 Hz, 2H), 3.56 (t, *J* = 6.5 Hz, 2H), 1.83-1.75 (m, 4H), 1.47-1.29 (m, 8H); MS (ESI) *m/z* 314.2 [M+H]<sup>+</sup>.

#### **General procedures for the preparation of intermediate (5a-v)**

To a stirred mixture of **4a-g** (0.5 mmol) and K<sub>2</sub>CO<sub>3</sub> (0.14 g, 1 mmol) in acetonitrile (10 mL), amine (1 mmol) was added and the mixture was refluxed for 8 h. After cooling to the room temperature, the mixture was filtered and the filtrate was evaporated under vacuum. The obtained residue was purified by silica gel chromatography with petroleum/acetone as eluent to give target compounds **5a-v**.

#### **4-(2-(Benzyl(methyl)amino)ethoxy)benzaldehyde (5a)**

Intermediate **4a** was treated with *N*-methyl-1-phenylmethanamine according to the general procedure to give a crude product. Then it was purified using silica gel chromatography with petroleum ether/EtOAc (6:1, v/v) as elution solvent to obtain the desired product **5a** as a light yellow oil, yield 78.2%. <sup>1</sup>H NMR (500 MHz, DMSO-*d*<sub>6</sub>) δ 9.89 (s, 1H), 7.87 (d, *J* = 8.5 Hz, 2H), 7.33 (d, *J* = 4.5 Hz, 4H), 7.28-7.24 (m, 1H), 7.15 (d, *J* = 8.5 Hz, 2H), 4.24 (t, *J* = 6.5 Hz, 2H), 3.59 (s, 2H), 2.79 (t, *J* = 6.0 Hz, 2H), 2.26 (s, 3H); MS (ESI) *m/z* 270.2 [M+H]<sup>+</sup>.

#### **4-(3-(Benzyl(methyl)amino)propoxy)benzaldehyde (5b)**

Intermediate **4b** was treated with *N*-methyl-1-phenylmethanamine according to the

general procedure to give a crude product. Then it was purified using silica gel chromatography with petroleum ether/EtOAc (20:1, v/v) as elution solvent to obtain the desired product **5b** as a light yellow oil, yield 80.0%. <sup>1</sup>H NMR (500 MHz, DMSO-*d*<sub>6</sub>) δ 9.89 (s, 1H), 7.88 (d, *J* = 9.0 Hz, 2H), 7.28 (d, *J* = 4.5 Hz, 4H), 7.25-7.21 (m, 1H), 7.11 (d, *J* = 8.5 Hz, 2H), 4.15 (t, *J* = 6.5 Hz, 2H), 3.49 (s, 2H), 2.50 (t, *J* = 7.0 Hz, 2H), 2.17 (s, 3H), 1.96-1.92 (m, 2H); MS (ESI) *m/z* 284.2 [M+H]<sup>+</sup>.

#### **4-(4-(Benzyl(methyl)amino)butoxy)benzaldehyde (5c)**

Intermediate **4c** was treated with *N*-methyl-1-phenylmethanamine according to the general procedure to give a crude product. Then it was purified using silica gel chromatography with petroleum ether/EtOAc (15:1, v/v) as elution solvent to obtain the desired product **5c** as a light yellow oil, yield 75.9%. <sup>1</sup>H NMR (500 MHz, DMSO-*d*<sub>6</sub>) δ 9.89 (s, 1H), 7.87 (d, *J* = 8.5 Hz, 2H), 7.34-7.29 (m, 4H), 7.26-7.23 (m, 1H), 7.12 (d, *J* = 8.5 Hz, 2H), 4.10 (t, *J* = 6.5 Hz, 2H), 3.47 (s, 2H), 2.39 (t, *J* = 7.0 Hz, 2H), 2.12 (s, 3H), 1.81-1.76 (m, 2H), 1.66-1.60 (m, 2H); MS (ESI) *m/z* 298.3 [M+H]<sup>+</sup>.

#### **4-((5-(Benzyl(methyl)amino)pentyl)oxy)benzaldehyde (5d)**

Intermediate **4d** was treated with *N*-methyl-1-phenylmethanamine according to the general procedure to give a crude product. Then it was purified using silica gel chromatography with petroleum ether/EtOAc (5:1, v/v) as elution solvent to obtain the desired product **5d** as a light yellow oil, yield 77.2%. <sup>1</sup>H NMR (500 MHz, DMSO-*d*<sub>6</sub>) δ 9.88 (s, 1H), 7.87 (d, *J* = 8.5 Hz, 2H), 7.34-7.29 (m, 4H), 7.26-7.23 (m, 1H), 7.13 (d, *J* = 8.5 Hz, 2H), 4.09 (t, *J* = 6.5 Hz, 2H), 3.45 (s, 2H), 2.34 (t, *J* = 7.0 Hz, 2H), 2.11 (s, 3H), 1.78-1.72 (m, 2H), 1.57-1.51 (m, 2H), 1.48-1.42 (m, 2H); MS (ESI) *m/z*

312.3 [M+H]<sup>+</sup>.

#### **4-((6-(Benzyl(methyl)amino)hexyl)oxy)benzaldehyde (5e)**

Intermediate **4e** was treated with *N*-methyl-1-phenylmethanamine according to the general procedure to give a crude product. Then it was purified using silica gel chromatography with petroleum ether/EtOAc (10:1, v/v) as elution solvent to obtain the desired product **5e** as a light yellow oil, yield 75.4%. <sup>1</sup>H NMR (500 MHz, DMSO-*d*<sub>6</sub>) δ 9.88 (s, 1H), 7.87 (d, *J* = 8.5 Hz, 2H), 7.33-7.29 (m, 4H), 7.25-7.23 (m, 1H), 7.13 (d, *J* = 8.5 Hz, 2H), 4.08 (t, *J* = 6.5 Hz, 2H), 3.44 (s, 2H), 2.33 (t, *J* = 7.0 Hz, 2H), 2.11 (s, 3H), 1.76-1.72 (m, 2H), 1.50-1.34 (m, 6H); MS (ESI) *m/z* 326.4 [M+H]<sup>+</sup>.

#### **4-((7-(Benzyl(methyl)amino)heptyl)oxy)benzaldehyde (5f)**

Intermediate **4f** was treated with *N*-methyl-1-phenylmethanamine according to the general procedure to give a crude product. Then it was purified using silica gel chromatography with petroleum ether/EtOAc (15:1, v/v) as elution solvent to obtain the desired product **5f** as a light yellow oil, yield 78.5%. <sup>1</sup>H NMR (500 MHz, DMSO-*d*<sub>6</sub>) δ 9.88 (s, 1H), 7.87 (d, *J* = 8.5 Hz, 2H), 7.33-7.29 (m, 4H), 7.26-7.23 (m, 1H), 7.13 (d, *J* = 8.5 Hz, 2H), 4.08 (t, *J* = 6.5 Hz, 2H), 3.44 (s, 2H), 2.32 (t, *J* = 7.0 Hz, 2H), 2.11 (s, 3H), 1.76-1.72 (m, 2H), 1.50-1.34 (m, 8H); MS (ESI) *m/z* 340.3 [M+H]<sup>+</sup>.

#### **4-((8-(Benzyl(methyl)amino)octyl)oxy)benzaldehyde (5g)**

Intermediate **4g** was treated with *N*-methyl-1-phenylmethanamine according to the general procedure to give a crude product. Then it was purified using silica gel chromatography with petroleum ether/EtOAc (10:1, v/v) as elution solvent to obtain the desired product **5g** as a light yellow oil, yield 76.8%. <sup>1</sup>H NMR (500 MHz, DMSO-

$d_6$ )  $\delta$  9.88 (s, 1H), 7.88 (d,  $J = 8.5$  Hz, 2H), 7.33-7.28 (m, 4H), 7.25-7.22 (m, 1H), 7.13 (d,  $J = 8.5$  Hz, 2H), 4.09 (t,  $J = 6.5$  Hz, 2H), 3.44 (s, 2H), 2.30 (t,  $J = 7.0$  Hz, 2H), 2.10 (s, 3H), 1.76-1.73 (m, 2H), 1.50-1.34 (m, 10H); MS (ESI)  $m/z$  354.4  $[M+H]^+$ .

#### **4-((6-(Benzyl(ethyl)amino)hexyl)oxy)benzaldehyde (5h)**

Intermediate **4e** was treated with *N*-benzylethanamine according to the general procedure to give a crude product. Then it was purified using silica gel chromatography with petroleum ether/EtOAc (6:1, v/v) as elution solvent to obtain the desired product **5h** as a light yellow oil, yield 74.5%.  $^1\text{H}$  NMR (500 MHz, DMSO- $d_6$ )  $\delta$  9.88 (s, 1H), 7.87 (d,  $J = 8.5$  Hz, 2H), 7.31-7.26 (m, 4H), 7.26-7.21 (m, 1H), 7.13 (d,  $J = 8.5$  Hz, 2H), 4.08 (t,  $J = 6.5$  Hz, 2H), 3.52 (s, 2H), 2.45 (t,  $J = 7.0$  Hz, 2H), 2.39 (t,  $J = 7.0$  Hz, 2H), 1.76-1.72 (m, 2H), 1.45-1.32 (m, 6H), 0.98 (s, 3H); MS (ESI)  $m/z$  340.4  $[M+H]^+$ .

#### **4-((6-(Ethyl(2-methoxybenzyl)amino)hexyl)oxy)benzaldehyde (5i)**

Intermediate **4e** was treated with *N*-(2-methoxybenzyl)ethanamine according to the general procedure to give a crude product. Then it was purified using silica gel chromatography with petroleum ether/EtOAc (6:1, v/v) as elution solvent to obtain the desired product **5i** as a colorless oil, yield 79.7%.  $^1\text{H}$  NMR (500 MHz, DMSO- $d_6$ )  $\delta$  9.88 (s, 1H), 7.87 (d,  $J = 8.0$  Hz, 2H), 7.36 (dd,  $J = 6.0$  Hz, 1.5 Hz, 1H), 7.20 (m, 1H), 7.11 (d,  $J = 8.5$  Hz, 2H), 6.95 (d,  $J = 8.5$  Hz, 1H), 6.91 (t,  $J = 7.5$  Hz, 1H), 4.08 (t,  $J = 6.5$  Hz, 2H), 3.74 (s, 3H), 3.51 (s, 2H), 2.45 (q,  $J = 7.0$  Hz, 2H), 2.40 (t,  $J = 7.5$  Hz, 2H), 1.76-1.70 (m, 2H), 1.48-1.31 (m, 6H), 0.99 (t,  $J = 7.0$  Hz, 3H); MS (ESI)  $m/z$  370.4  $[M+H]^+$ .

#### **4-((6-(Ethyl(3-methoxybenzyl)amino)hexyl)oxy)benzaldehyde (5j)**

Intermediate **4e** was treated with *N*-(3-methoxybenzyl)ethanamine according to the general procedure to give a crude product. Then it was purified using silica gel chromatography with petroleum ether/EtOAc (6:1, v/v) as elution solvent to obtain the desired product **5j** as a colorless oil, yield 76.5%. <sup>1</sup>H NMR (500 MHz, DMSO-*d*<sub>6</sub>)  $\delta$  9.88 (s, 1H), 7.87 (d, *J* = 9.0 Hz, 2H), 7.21 (t, *J* = 8.0 Hz, 1H), 7.11 (d, *J* = 8.5 Hz, 2H), 6.90-6.87 (m, 2H), 6.80-6.78 (m, 1H), 4.07 (t, *J* = 6.5 Hz, 2H), 3.74 (s, 3H), 3.50 (s, 2H), 2.45 (q, *J* = 7.0 Hz, 2H), 2.39 (t, *J* = 7.0 Hz, 2H), 1.73-1.71 (m, 2H), 1.45-1.33 (m, 6H), 0.98 (t, *J* = 7.0 Hz, 3H); MS (ESI) *m/z* 370.4 [M+H]<sup>+</sup>.

#### **4-((6-(Ethyl(4-methoxybenzyl)amino)hexyl)oxy)benzaldehyde (5k)**

Intermediate **4e** was treated with *N*-(4-methoxybenzyl)ethanamine according to the general procedure to give a crude product. Then it was purified using silica gel chromatography with petroleum ether/EtOAc (6:1, v/v) as elution solvent to obtain the desired product **5k** as a colorless oil, yield 74.3%. <sup>1</sup>H NMR (500 MHz, DMSO-*d*<sub>6</sub>)  $\delta$  9.88 (s, 1H), 7.87 (d, *J* = 8.5 Hz, 2H), 7.21 (d, *J* = 8.5 Hz, 2H), 7.12 (d, *J* = 8.5 Hz, 2H), 6.86 (d, *J* = 8.5 Hz, 2H), 4.08 (t, *J* = 6.5 Hz, 2H), 3.73 (s, 3H), 3.45 (s, 2H), 2.43 (q, *J* = 7.0 Hz, 2H), 2.37 (t, *J* = 7.5 Hz, 2H), 1.75-1.70 (m, 2H), 1.45-1.31 (m, 6H), 0.97 (t, *J* = 7.0 Hz, 3H); MS (ESI) *m/z* 370.4 [M+H]<sup>+</sup>.

#### **4-((6-(Ethyl(2-fluorobenzyl)amino)hexyl)oxy)benzaldehyde (5l)**

Intermediate **4e** was treated with *N*-(2-fluorobenzyl)ethanamine according to the general procedure to give a crude product. Then it was purified using silica gel chromatography with petroleum ether/EtOAc (6:1, v/v) as elution solvent to obtain

the desired product **5l** as a colorless oil, yield 72.0%. <sup>1</sup>H NMR (500 MHz, DMSO-*d*<sub>6</sub>)  $\delta$  9.88 (s, 1H), 7.87 (d, *J* = 8.5 Hz, 2H), 7.45-7.41 (m, 1H), 7.31-7.26 (m, 1H), 7.18-7.10 (m, 4H), 4.07 (t, *J* = 6.5 Hz, 2H), 3.57 (s, 2H), 2.45 (q, *J* = 7.0 Hz, 2H), 2.40 (t, *J* = 7.0 Hz, 2H), 1.76-1.70 (m, 2H), 1.48-1.30 (m, 6H), 0.99 (t, *J* = 7.0 Hz, 3H); MS (ESI) *m/z* 358.4 [M+H]<sup>+</sup>.

#### **4-((6-(Ethyl(3-fluorobenzyl)amino)hexyl)oxy)benzaldehyde (5m)**

Intermediate **4e** was treated with *N*-(3-fluorobenzyl)ethanamine according to the general procedure to give a crude product. Then it was purified using silica gel chromatography with petroleum ether/EtOAc (6:1, v/v) as elution solvent to obtain the desired product **5m** as a colorless oil, yield 73.3%. <sup>1</sup>H NMR (500 MHz, DMSO-*d*<sub>6</sub>)  $\delta$  9.88 (s, 1H), 7.87 (d, *J* = 9.0 Hz, 2H), 7.37-7.32 (m, 1H), 7.16-7.10 (m, 4H), 7.06-7.02 (m, 1H), 4.07 (t, *J* = 6.5 Hz, 2H), 3.54 (s, 2H), 2.45 (q, *J* = 7.0 Hz, 2H), 2.39 (t, *J* = 7.0 Hz, 2H), 1.76-1.70 (m, 2H), 1.48-1.30 (m, 6H), 0.98 (t, *J* = 7.0 Hz, 3H); MS (ESI) *m/z* 358.4 [M+H]<sup>+</sup>.

#### **4-((6-(Ethyl(4-fluorobenzyl)amino)hexyl)oxy)benzaldehyde (5n)**

Intermediate **4e** was treated with *N*-(4-fluorobenzyl)ethanamine according to the general procedure to give a crude product. Then it was purified using silica gel chromatography with petroleum ether/EtOAc (6:1, v/v) as elution solvent to obtain the desired product **5n** as a colorless oil, yield 70.0%. <sup>1</sup>H NMR (500 MHz, DMSO-*d*<sub>6</sub>)  $\delta$  9.88 (s, 1H), 7.89-7.85 (m, 2H), 7.35-7.33 (m, 2H), 7.14-7.10 (m, 4H), 4.08 (t, *J* = 6.5 Hz, 2H), 3.50 (s, 2H), 2.44 (q, *J* = 7.0 Hz, 2H), 2.38 (t, *J* = 7.5 Hz, 2H), 1.76-1.71 (m, 2H), 1.47-1.30 (m, 6H), 0.98 (t, *J* = 7.0 Hz, 3H); MS (ESI) *m/z* 358.4 [M+H]<sup>+</sup>.

#### **4-((6-(Diethylamino)hexyl)oxy)benzaldehyde (5o)**

Intermediate **4e** was treated with diethylamine according to the general procedure to give a crude product. Then it was purified using silica gel chromatography with petroleum ether/EtOAc (2:1, v/v) as elution solvent to obtain the desired product **5o** as a light yellow oil, yield 80.2%. <sup>1</sup>H NMR (500 MHz, DMSO-*d*<sub>6</sub>) δ 9.88 (s, 1H), 7.88 (d, *J* = 8.5 Hz, 2H), 7.13 (d, *J* = 8.5 Hz, 2H), 4.10 (t, *J* = 6.5 Hz, 2H), 2.44 (q, *J* = 6.5 Hz, 4H), 2.35 (t, *J* = 7.0 Hz, 2H), 1.77-1.73 (m, 2H), 1.44-1.33 (m, 6H), 0.94 (t, *J* = 7.0 Hz, 6H); MS (ESI) *m/z* 278.3 [M+H]<sup>+</sup>.

#### **4-((6-(Dimethylamino)hexyl)oxy)benzaldehyde (5p)**

Intermediate **4e** was treated with dimethylamine according to the general procedure to give a crude product. Then it was purified using silica gel chromatography with petroleum ether/EtOAc (2:1, v/v) as elution solvent to obtain the desired product **5p** as a light yellow oil, yield 80.5%. <sup>1</sup>H NMR (500 MHz, DMSO-*d*<sub>6</sub>) δ 9.88 (s, 1H), 7.86 (d, *J* = 8.5 Hz, 2H), 7.13 (d, *J* = 8.5 Hz, 2H), 4.10 (t, *J* = 6.5 Hz, 2H), 2.19 (t, *J* = 6.5 Hz, 2H), 2.11 (s, 6H), 1.76-1.74 (m, 2H), 1.47-1.25 (m, 6H); MS (ESI) *m/z* 250.2 [M+H]<sup>+</sup>.

#### **4-((6-(Dipropylamino)hexyl)oxy)benzaldehyde (5q)**

Intermediate **4e** was treated with dipropylamine according to the general procedure to give a crude product. Then it was purified using silica gel chromatography with petroleum ether/EtOAc (3:1, v/v) as elution solvent to obtain the desired product **5q** as a light yellow oil, yield 79.6%. <sup>1</sup>H NMR (500 MHz, DMSO-*d*<sub>6</sub>) δ 9.88 (s, 1H), 7.88 (d, *J* = 8.5 Hz, 2H), 7.13 (d, *J* = 8.5 Hz, 2H), 4.09 (t, *J* = 6.5 Hz, 2H), 2.34 (t, *J* = 6.0

Hz, 2H), 2.30 (t,  $J = 7.0$  Hz, 4H), 1.76-1.72 (m, 2H), 1.44-1.35 (m, 10H), 0.84 (t,  $J = 7.0$  Hz, 6H); MS (ESI)  $m/z$  306.3  $[M+H]^+$ .

#### **4-((6-(Pyrrolidin-1-yl)hexyl)oxy)benzaldehyde (5r)**

Intermediate **4e** was treated with pyrrolidine according to the general procedure to give a crude product. Then it was purified using silica gel chromatography with petroleum  $CH_2Cl_2/MeOH$  (20:1, v/v) as elution solvent to obtain the desired product **5r** as a pale yellow oil, yield 79.6%.  $^1H$  NMR (500 MHz,  $DMSO-d_6$ )  $\delta$  9.88 (s, 1H), 7.88 (d,  $J = 8.5$  Hz, 2H), 7.13 (d,  $J = 8.5$  Hz, 2H), 4.09 (t,  $J = 6.5$  Hz, 2H), 2.60-2.54 (br s, 6H), 1.79-1.73 (m, 6H), 1.54-1.34 (m, 6H); MS (ESI)  $m/z$  276.2  $[M+H]^+$ .

#### **4-((6-(Piperidin-1-yl)hexyl)oxy)benzaldehyde (5s)**

Intermediate **4e** was treated with piperidine according to the general procedure to give a crude product. Then it was purified using silica gel chromatography with petroleum ether/EtOAc (3:1, v/v) as elution solvent to obtain the desired product **5s** as a pale yellow oil, yield 77.4%.  $^1H$  NMR (500 MHz,  $DMSO-d_6$ )  $\delta$  9.88 (s, 1H), 7.88 (d,  $J = 8.5$  Hz, 2H), 7.13 (d,  $J = 8.5$  Hz, 2H), 4.09 (t,  $J = 6.5$  Hz, 2H), 2.29 (br s, 4H), 2.21 (t,  $J = 7.0$  Hz, 2H), 1.77-1.72 (m, 2H), 1.50-1.30 (m, 12H); MS (ESI)  $m/z$  290.3  $[M+H]^+$ .

#### **4-((6-(2-Methylpiperidin-1-yl)hexyl)oxy)benzaldehyde (5t)**

Intermediate **4e** was treated with 2-methylpiperidine according to the general procedure to give a crude product. Then it was purified using silica gel chromatography with petroleum ether/EtOAc (2:1, v/v) as elution solvent to obtain the desired product **5t** as a light yellow oil, yield 77.4%.  $^1H$  NMR (500 MHz,  $DMSO-d_6$ )  $\delta$  9.88 (s, 1H), 7.87 (d,  $J = 9.0$  Hz, 2H), 7.13 (d,  $J = 8.5$  Hz, 2H), 4.10 (t,  $J = 6.5$

Hz, 2H), 2.77-2.73 (m, 1H), 2.61-2.56 (m, 1H), 2.23-2.17 (m, 2H), 2.07-2.02 (m, 1H), 1.75 (m, 2H), 1.60-1.16 (m, 12H), 0.98 (d,  $J = 6.5$  Hz, 3H) ; MS (ESI)  $m/z$  304.3 [M+H]<sup>+</sup>.

#### **4-((6-(4-Hydroxypiperidin-1-yl)hexyl)oxy)benzaldehyde (5u)**

Intermediate **4e** was treated with piperidin-4-ol according to the general procedure to give a crude product. Then it was purified using silica gel chromatography with CH<sub>2</sub>Cl<sub>2</sub>/MeOH (10:1, v/v) as elution solvent to obtain the desired product **5u** as a light yellow oil, yield 75.0%. <sup>1</sup>H NMR (500 MHz, DMSO-*d*<sub>6</sub>)  $\delta$  9.89 (s, 1H), 7.88 (d,  $J = 8.5$  Hz, 2H), 7.14 (d,  $J = 8.5$  Hz, 2H), 4.11 (t,  $J = 6.5$  Hz, 2H), 3.64-3.07 (m, 8H), 1.83-1.74 (m, 4H), 1.59 (br s, 4H), 1.50-1.44 (m, 2H), 1.39-1.34 (m, 2H); MS (ESI)  $m/z$  306.3 [M+H]<sup>+</sup>.

#### **4-((6-Morpholinohexyl)oxy)benzaldehyde (5v)**

Intermediate **4e** was treated with morpholine according to the general procedure to give a crude product. Then it was purified using silica gel chromatography with petroleum ether/EtOAc (3:1, v/v) as elution solvent to obtain the desired product **5v** as a light yellow oil, yield 73.1%. <sup>1</sup>H NMR (500 MHz, DMSO-*d*<sub>6</sub>)  $\delta$  9.88 (s, 1H), 7.87 (d,  $J = 8.5$  Hz, 2H), 7.13 (d,  $J = 8.5$  Hz, 2H), 4.10 (t,  $J = 6.5$  Hz, 2H), 3.57 (t,  $J = 4.5$  Hz, 4H), 2.33 (br s, 4H), 2.26 (t,  $J = 7.5$  Hz, 2H), 1.78-1.72 (m, 2H), 1.50-1.41(m, 4H), 1.38-1.32(m, 2H); MS (ESI)  $m/z$  292.3 [M+H]<sup>+</sup>.

#### **General procedures for the preparation of (6a-v)**

After the mixture of compound **3** (0.5 mmol) and sodium methylate (0.16 g, 3 mmol) in dry DMF were stirred at 0 °C for 30 min under argon, compounds **5a-v** (0.45 mmol)

in dry DMF was added respectively. The resulting mixture was stirred overnight at room temperature, quenched by the addition of ice water and extracted by EtOAc. The solvent was removed and the crude product was purified by silica gel column chromatography.

**(*E*)-*N*-benzyl-2-(4-(3,5-dimethoxystyryl)phenoxy)-*N*-methylethanamine (6a)**

Intermediate **5a** was reacted with **3** according to the general procedure to give a crude product. Then it was purified using silica gel chromatography with petroleum ether/EtOAc (5:1, v/v) as elution solvent to obtain the desired product **6a** as a light yellow oil, yield 50.2%; IR (KBr)  $\nu$  3454, 2936, 2836, 1595, 1510, 1457, 1250, 1204, 1152, 1065, 832, 739, 700  $\text{cm}^{-1}$ ;  $^1\text{H}$  NMR (500 MHz,  $\text{DMSO-}d_6$ )  $\delta$  7.54 (d,  $J = 8.5$  Hz, 2H, Ar-H), 7.37 (m, 4H, Ar-H), 7.29-7.26 (m, 1H, Ar-H), 7.23 (d,  $J = 16.5$  Hz, 1H, CH=CH), 7.04 (d,  $J = 16.5$  Hz, 1H, CH=CH), 6.97 (d,  $J = 8.5$  Hz, 2H, Ar-H), 6.76 (d,  $J = 2.0$  Hz, 2H, Ar-H), 6.41 (t,  $J = 2.5$  Hz, 1H, Ar-H), 4.14 (t,  $J = 6.0$  Hz, 2H,  $\text{OCH}_2$ ), 3.79 (s, 6H,  $\text{OCH}_3$ ), 3.60 (s, 2H, Ph- $\text{CH}_2\text{N}$ ), 2.77 (t,  $J = 6.0$  Hz, 2H,  $\text{NCH}_2$ ), 2.26 (s, 3H,  $\text{NCH}_3$ );  $^{13}\text{C}$  NMR (125 MHz,  $\text{DMSO-}d_6$ )  $\delta$  161.17, 158.79, 139.95, 139.54, 130.07, 129.18, 129.08, 128.60, 128.31, 127.33, 126.69, 115.27, 104.74, 100.04, 66.55, 62.19, 55.77, 55.69, 42.89; Purity: 98.6% by HPLC ( $t_{\text{R}}$  8.9 min); MS (ESI)  $m/z$  404.3  $[\text{M}+\text{H}]^+$ ; HRMS (ESI)  $m/z$  404.2221  $[\text{M}+\text{H}]^+$  (calcd for  $\text{C}_{26}\text{H}_{30}\text{NO}_3$ , 404.2220).

**(*E*)-*N*-benzyl-3-(4-(3,5-dimethoxystyryl)phenoxy)-*N*-methylpropan-1-amine (6b)**

Intermediate **5b** was reacted with **3** according to the general procedure to give a crude product. Then it was purified using silica gel chromatography with petroleum ether/acetone (30:1, v/v) as elution solvent to obtain the desired product **6b** as a light

yellow oil, yield 48.3%; IR (KBr)  $\nu$  3454, 2953, 2837, 1560, 1511, 1459, 1251, 1204, 1153, 1065, 833, 738, 700  $\text{cm}^{-1}$ ;  $^1\text{H}$  NMR (500 MHz,  $\text{DMSO-}d_6$ )  $\delta$  7.54 (d,  $J = 9.0$  Hz, 2H, Ar-H), 7.32-7.31 (m, 4H, Ar-H), 7.27-7.21 (m, 2H, Ar-H, CH=CH), 7.04 (d,  $J = 16.0$  Hz, 1H, CH=CH), 6.93 (d,  $J = 9.0$  Hz, 2H, Ar-H), 6.76 (d,  $J = 2.0$  Hz, 2H, Ar-H), 6.41 (t,  $J = 2.5$  Hz, 1H, Ar-H), 4.06 (t,  $J = 6.0$  Hz, 2H,  $\text{OCH}_2$ ), 3.80 (s, 6H,  $\text{OCH}_3$ ), 3.50 (s, 2H, Ph- $\text{CH}_2\text{N}$ ), 2.51 (t,  $J = 7.0$  Hz, 2H,  $\text{NCH}_2$ ), 2.16 (s, 3H,  $\text{NCH}_3$ ), 1.95-1.90 (m, 2H, alkyl chains-H);  $^{13}\text{C}$  NMR (125 MHz,  $\text{DMSO-}d_6$ )  $\delta$  161.17, 158.98, 139.97, 139.63, 129.97, 129.11, 128.56, 128.31, 127.24, 126.64, 115.23, 104.73, 100.02, 66.33, 62.07, 55.69, 53.78, 42.34, 27.20; Purity: 97.9% by HPLC ( $t_{\text{R}}$  9.2 min); MS (ESI)  $m/z$  418.3  $[\text{M}+\text{H}]^+$ ; HRMS (ESI)  $m/z$  418.2379  $[\text{M}+\text{H}]^+$  (calcd for  $\text{C}_{27}\text{H}_{32}\text{NO}_3$ , 418.2377).

**(*E*)-*N*-benzyl-4-(4-(3,5-dimethoxystyryl)phenoxy)-*N*-methylbutan-1-amine (6c)**

Intermediate **5c** was reacted with **3** according to the general procedure to give a crude product. Then it was purified using silica gel chromatography with petroleum ether/EtOAc (7:1, v/v) as elution solvent to obtain the desired product **6c** as a colorless oil, yield 50.0%; IR (KBr)  $\nu$  3443, 2939, 2837, 1570, 1511, 1460, 1251, 1205, 1154, 1065, 833, 739, 700  $\text{cm}^{-1}$ ;  $^1\text{H}$  NMR (500 MHz,  $\text{DMSO-}d_6$ )  $\delta$  7.53 (d,  $J = 8.5$  Hz, 2H, Ar-H), 7.35-7.30 (m, 4H, Ar-H), 7.27-7.24 (m, 1H, Ar-H), 7.23 (d,  $J = 16.0$  Hz, 1H, CH=CH), 7.04 (d,  $J = 16.0$  Hz, 1H, CH=CH), 6.94 (d,  $J = 8.5$  Hz, 2H, Ar-H), 6.76 (d,  $J = 2.0$  Hz, 2H, Ar-H), 6.41 (t,  $J = 2.0$  Hz, 1H, Ar-H), 4.00 (t,  $J = 6.5$  Hz, 2H,  $\text{OCH}_2$ ), 3.80 (s, 6H,  $\text{OCH}_3$ ), 3.47 (s, 2H, Ph- $\text{CH}_2\text{N}$ ), 2.40 (t,  $J = 7.0$  Hz, 2H,  $\text{NCH}_2$ ), 2.13 (s, 3H,  $\text{NCH}_3$ ), 1.79-1.73 (m, 2H, alkyl chains-H), 1.66-1.60 (m, 2H,

alkyl chains-H);  $^{13}\text{C}$  NMR (125 MHz,  $\text{DMSO-}d_6$ ):  $\delta$  161.17, 158.98, 139.97, 129.15, 129.12, 128.57, 128.30, 126.62, 115.23, 104.73, 100.02, 67.89, 62.05, 56.77, 55.69, 42.22, 40.10, 26.99, 23.74; Purity: 98.9% by HPLC ( $t_R$  10.0 min); MS (ESI)  $m/z$  432.4  $[\text{M}+\text{H}]^+$ ; HRMS (ESI)  $m/z$  432.2534  $[\text{M}+\text{H}]^+$  (calcd for  $\text{C}_{28}\text{H}_{34}\text{NO}_3$ , 432.2533).

**(*E*)-*N*-benzyl-5-(4-(3,5-dimethoxystyryl)phenoxy)-*N*-methylpentan-1-amine (6d)**

Intermediate **5d** was reacted with **3** according to the general procedure to give a crude product. Then it was purified using silica gel chromatography with petroleum ether/acetone (10:1, v/v) as elution solvent to obtain the desired product **6d** as a dark yellow oil, yield 48.8%; IR (KBr)  $\nu$  3444, 2939, 2864, 2837, 1596, 1511, 1460, 1251, 1204, 1154, 1066, 834, 741, 700  $\text{cm}^{-1}$ ;  $^1\text{H}$  NMR (500 MHz,  $\text{DMSO-}d_6$ )  $\delta$  7.53 (d,  $J = 8.5$  Hz, 2H, Ar-H), 7.35-7.29 (m, 4H, Ar-H), 7.27-7.24 (m, 1H, Ar-H), 7.22 (d,  $J = 16.5$  Hz, 1H, CH=CH), 7.03 (d,  $J = 16.5$  Hz, 1H, CH=CH), 6.95 (d,  $J = 8.5$  Hz, 2H, Ar-H), 6.76 (d,  $J = 2.0$  Hz, 2H, Ar-H), 6.41 (t,  $J = 2.0$  Hz, 1H, Ar-H), 4.00 (t,  $J = 6.5$  Hz, 2H,  $\text{OCH}_2$ ), 3.80 (s, 6H,  $\text{OCH}_3$ ), 3.46 (s, 2H, Ph- $\text{CH}_2\text{N}$ ), 2.35 (t,  $J = 7.0$  Hz, 2H,  $\text{NCH}_2$ ), 2.12 (s, 3H,  $\text{NCH}_3$ ), 1.77-1.69 (m, 2H, alkyl chains-H), 1.57-1.51 (m, 2H, alkyl chains-H), 1.48-1.41 (m, 2H, alkyl chains-H);  $^{13}\text{C}$  NMR (125 MHz,  $\text{DMSO-}d_6$ ):  $\delta$  161.17, 159.01, 139.97, 139.82, 129.11, 128.55, 128.31, 127.21, 126.60, 115.20, 104.72, 100.01, 68.02, 62.11, 57.13, 55.69, 42.31, 29.05, 26.98, 23.83; Purity: 99.0% by HPLC ( $t_R$  11.3 min); MS (ESI)  $m/z$  446.4  $[\text{M}+\text{H}]^+$ ; HRMS (ESI)  $m/z$  446.2691  $[\text{M}+\text{H}]^+$  (calcd for  $\text{C}_{29}\text{H}_{36}\text{NO}_3$ , 446.2690).

**(*E*)-*N*-benzyl-6-(4-(3,5-dimethoxystyryl)phenoxy)-*N*-methylhexan-1-amine (6e)**

Intermediate **5e** was reacted with **3** according to the general procedure to give a crude

product. Then it was purified using silica gel chromatography with petroleum ether/acetone (8:1, v/v) as elution solvent to obtain the desired product **6e** as a light yellow oil, yield 51.0%; IR (KBr)  $\nu$  3455, 2937, 2837, 1597, 1511, 1460, 1251, 1204, 1153, 1067, 834, 740, 700  $\text{cm}^{-1}$ ;  $^1\text{H}$  NMR (500 MHz,  $\text{DMSO-}d_6$ )  $\delta$  7.53 (d,  $J = 9.0$  Hz, 2H, Ar-H), 7.34-7.29 (m, 4H, Ar-H), 7.27-7.24 (m, 1H, Ar-H), 7.22 (d,  $J = 16.5$  Hz, 1H, CH=CH), 7.03 (d,  $J = 16.5$  Hz, 1H, CH=CH), 6.95 (d,  $J = 9.0$  Hz, 2H, Ar-H), 6.76 (d,  $J = 2.0$  Hz, 2H, Ar-H), 6.41 (t,  $J = 2.0$  Hz, 1H, Ar-H), 3.99 (t,  $J = 6.5$  Hz, 2H,  $\text{OCH}_2$ ), 3.80 (s, 6H,  $\text{OCH}_3$ ), 3.45 (s, 2H, Ph- $\text{CH}_2\text{N}$ ), 2.33 (t,  $J = 7.0$  Hz, 2H,  $\text{NCH}_2$ ), 2.11 (s, 3H,  $\text{NCH}_3$ ), 1.77-1.69 (m, 2H, alkyl chains-H), 1.53-1.32 (m, 6H, alkyl chains-H);  $^{13}\text{C}$  NMR (125 MHz,  $\text{DMSO-}d_6$ ):  $\delta$  161.17, 159.00, 139.97, 129.93, 129.12, 128.55, 128.31, 127.20, 126.61, 115.20, 104.72, 100.02, 68.00, 62.13, 57.13, 55.69, 42.33, 29.17, 27.20, 27.02, 25.88; Purity: 98.1% by HPLC ( $t_R$  8.0 min); MS (ESI)  $m/z$  460.4  $[\text{M}+\text{H}]^+$ ; HRMS (ESI)  $m/z$  460.2849  $[\text{M}+\text{H}]^+$  (calcd for  $\text{C}_{30}\text{H}_{38}\text{NO}_3$ , 460.2846).

**(E)-N-benzyl-7-(4-(3,5-dimethoxystyryl)phenoxy)-N-methylheptan-1-amine (6f)**

Intermediate **5f** was reacted with **3** according to the general procedure to give a crude product. Then it was purified using silica gel chromatography with petroleum ether/acetone (10:1, v/v) as elution solvent to obtain the desired product **6f** as a light yellow oil, yield 40.0%; IR (KBr)  $\nu$  3455, 2937, 2854, 1597, 1511, 1460, 1251, 1204, 1153, 1067, 834, 740, 700  $\text{cm}^{-1}$ ;  $^1\text{H}$  NMR (500 MHz,  $\text{DMSO-}d_6$ )  $\delta$  7.53 (d,  $J = 9.0$  Hz, 2H, Ar-H), 7.34-7.29 (m, 4H, Ar-H), 7.27-7.24 (m, 1H, Ar-H), 7.22 (d,  $J = 16.5$  Hz, 1H, CH=CH), 7.03 (d,  $J = 16.5$  Hz, 1H, CH=CH), 6.95 (d,  $J = 9.0$  Hz, 2H, Ar-H), 6.76 (d,  $J = 2.0$  Hz, 2H, Ar-H), 6.41 (t,  $J = 2.0$  Hz, 1H, Ar-H), 3.99 (t,  $J = 6.5$  Hz, 2H,

OCH<sub>2</sub>), 3.80 (s, 6H, OCH<sub>3</sub>), 3.45 (s, 2H, Ph-CH<sub>2</sub>N), 2.30 (t,  $J = 7.0$  Hz, 2H, NCH<sub>2</sub>), 2.10 (s, 3H, NCH<sub>3</sub>), 1.76-1.69 (m, 2H, alkyl chains-H), 1.52-1.28 (m, 8H, alkyl chains-H); <sup>13</sup>C NMR (125 MHz, DMSO-*d*<sub>6</sub>):  $\delta$  161.17, 159.01, 139.97, 139.85, 129.93, 129.11, 129.08, 128.53, 128.30, 127.18, 126.60, 115.20, 104.72, 100.01, 68.00, 62.14, 57.15, 55.68, 42.32, 40.09, 29.31, 29.23, 27.20, 27.14, 25.90; Purity: 99.0% by HPLC ( $t_R$  9.3 min); MS (ESI)  $m/z$  474.4 [M+H]<sup>+</sup>; HRMS (ESI)  $m/z$  474.3003 [M+H]<sup>+</sup> (calcd for C<sub>31</sub>H<sub>40</sub>NO<sub>3</sub>, 474.3002).

**(*E*)-*N*-benzyl-8-(4-(3,5-dimethoxystyryl)phenoxy)-*N*-methyloctan-1-amine (6g)**

Intermediate **5g** was reacted with **3** according to the general procedure to give a crude product. Then it was purified using silica gel chromatography with petroleum ether/acetone (15:1, v/v) as elution solvent to obtain the desired product **6g** as a light yellow oil, yield 41.5%; IR (KBr)  $\nu$  3448, 2933, 2854, 1595, 1511, 1459, 1251, 1204, 1152, 10676, 833, 738, 700 cm<sup>-1</sup>; <sup>1</sup>H NMR (500 MHz, DMSO-*d*<sub>6</sub>)  $\delta$  7.53 (d,  $J = 8.5$  Hz, 2H, Ar-H), 7.34-7.28 (m, 4H, Ar-H), 7.26-7.22 (m, 1H, Ar-H), 7.22 (d,  $J = 16.5$  Hz, 1H, CH=CH), 7.03 (d,  $J = 16.5$  Hz, 1H, CH=CH), 6.95 (d,  $J = 8.5$  Hz, 2H, Ar-H), 6.76 (d,  $J = 2.0$  Hz, 2H, Ar-H), 6.41 (br s, 1H, Ar-H), 3.99 (t,  $J = 6.5$  Hz, 2H, OCH<sub>2</sub>), 3.79 (s, 6H, OCH<sub>3</sub>), 3.44 (s, 2H, Ph-CH<sub>2</sub>N), 2.30 (t,  $J = 7.0$  Hz, 2H, NCH<sub>2</sub>), 2.10 (s, 3H, NCH<sub>3</sub>), 1.76-1.68 (m, 2H, alkyl chains-H), 1.50-1.23 (m, 10H, alkyl chains-H); <sup>13</sup>C NMR (125 MHz, DMSO-*d*<sub>6</sub>):  $\delta$  161.17, 159.01, 139.97, 139.85, 129.93, 129.10, 129.08, 128.53, 128.30, 127.18, 126.60, 115.19, 104.72, 100.01, 68.01, 62.14, 57.17, 55.68, 42.32, 40.09, 29.31, 29.23, 29.15, 27.22, 27.20, 25.96; Purity: 99.2% by HPLC ( $t_R$  15.7 min); MS (ESI)  $m/z$  488.5 [M+H]<sup>+</sup>; HRMS (ESI)  $m/z$  488.3158 [M+H]<sup>+</sup>

(calcd for C<sub>32</sub>H<sub>42</sub>NO<sub>3</sub>, 488.3159).

**(E)-N-benzyl-6-(4-(3,5-dimethoxystyryl)phenoxy)-N-ethylhexan-1-amine (6h)**

Intermediate **5h** was reacted with **3** according to the general procedure to give a crude product. Then it was purified using silica gel chromatography with petroleum ether/acetone (20:1, v/v) as elution solvent to obtain the desired product **6h** as a colorless oil, yield 51.3%; IR (KBr)  $\nu$  3444, 2936, 2857, 1602, 1512, 1463, 1247, 1206, 1057, 823, 701 cm<sup>-1</sup>; <sup>1</sup>H NMR (500 MHz, DMSO-*d*<sub>6</sub>)  $\delta$  7.53 (d, *J* = 9.0 Hz, 2H, Ar-H), 7.32-7.29 (m, 4H, Ar-H), 7.27-7.22 (m, 2H, Ar-H, CH=CH), 7.03 (d, *J* = 16.5 Hz, 1H, CH=CH), 6.94 (d, *J* = 9.0 Hz, 2H, Ar-H), 6.75 (d, *J* = 2.5 Hz, 2H, Ar-H), 6.41 (t, *J* = 2.0 Hz, 1H, Ar-H), 3.97 (t, *J* = 6.5 Hz, 2H, OCH<sub>2</sub>), 3.79 (s, 6H, OCH<sub>3</sub>), 3.53 (s, 2H, Ph-CH<sub>2</sub>N), 2.48-2.43 (m, 2H, NCH<sub>2</sub>CH<sub>3</sub>), 2.39 (t, *J* = 7.5 Hz, 2H, NCH<sub>2</sub>), 1.71-1.69 (m, 2H, alkyl chains-H), 1.46-1.32 (m, 6H, alkyl chains-H), 0.99 (t, *J* = 7.0 Hz, 3H, CH<sub>2</sub>CH<sub>3</sub>); <sup>13</sup>C NMR (125 MHz, DMSO-*d*<sub>6</sub>):  $\delta$  161.17, 159.00, 140.59, 139.97, 129.93, 129.11, 128.93, 128.50, 128.31, 127.03, 126.61, 115.19, 104.72, 100.01, 67.98, 58.01, 55.69, 52.98, 47.27, 29.16, 27.05, 26.98, 25.85, 12.16; Purity: 99.2% by HPLC (*t*<sub>R</sub> 13.9 min); MS (ESI) *m/z* 474.4 [M+H]<sup>+</sup>; HRMS (ESI) *m/z* 474.3002 [M+H]<sup>+</sup> (calcd for C<sub>31</sub>H<sub>40</sub>NO<sub>3</sub>, 474.3003).

**(E)-6-(4-(3,5-Dimethoxystyryl)phenoxy)-N-ethyl-N-(3-methoxybenzyl)hexan-1-amine (6i)**

Intermediate **5i** was reacted with **3** according to the general procedure to give a crude product. Then it was purified using silica gel chromatography with petroleum ether/EtOAc (30:1, v/v) as elution solvent to obtain the desired product **6i** as a

colorless oil, yield 51.4%; IR (KBr)  $\nu$  3445, 2936, 2858, 2836, 1596, 1510, 1462, 1250, 1152, 1066, 834, 755  $\text{cm}^{-1}$ ;  $^1\text{H}$  NMR (500 MHz,  $\text{DMSO-}d_6$ )  $\delta$  7.53 (d,  $J = 9.0$  Hz, 2H, Ar-H), 7.38-7.35 (m, 1H, Ar-H), 7.24-7.19 (m, 2H, Ar-H, CH=CH), 7.03 (d,  $J = 16.0$  Hz, 1H, CH=CH), 6.97-6.90 (m, 4H, Ar-H), 6.76 (d,  $J = 2.0$  Hz, 2H, Ar-H), 6.41 (t,  $J = 2.0$  Hz, 1H, Ar-H), 3.97 (t,  $J = 6.0$  Hz, 2H,  $\text{OCH}_2$ ), 3.79 (s, 6H,  $\text{OCH}_3$ ), 3.78 (s, 3H,  $\text{OCH}_3$ ), 3.52 (s, 2H, Ph- $\text{CH}_2\text{N}$ ), 2.48-2.44 (q,  $J = 7.0$  Hz, 2H,  $\text{NCH}_2\text{CH}_3$ ), 2.41 (t,  $J = 7.0$  Hz, 2H,  $\text{NCH}_2$ ), 1.74-1.68 (m, 2H, alkyl chains-H), 1.49-1.31 (m, 6H, alkyl chains-H), 0.99 (t,  $J = 7.0$  Hz, 3H,  $\text{CH}_2\text{CH}_3$ );  $^{13}\text{C}$  NMR (125 MHz,  $\text{DMSO-}d_6$ ):  $\delta$  161.16, 158.99, 157.74, 139.96, 129.92, 129.80, 129.10, 128.29, 127.95, 126.59, 120.52, 115.18, 111.09, 104.72, 100.01, 67.99, 55.75, 55.68, 55.35, 53.35, 51.55, 47.69, 29.18, 27.15, 27.10, 25.87, 12.38; Purity: 98.0% by HPLC ( $t_{\text{R}}$  14.5 min); MS (ESI)  $m/z$  504.5  $[\text{M}+\text{H}]^+$ ; HRMS (ESI)  $m/z$   $[\text{M}+\text{H}]^+$  504.3105 (calcd for  $\text{C}_{32}\text{H}_{42}\text{NO}_4$ , 504.3108).

**(*E*)-6-(4-(3,5-Dimethoxystyryl)phenoxy)-*N*-ethyl-*N*-(3-methoxybenzyl)hexan-1-amine (6j)**

Intermediate **5j** was reacted with **3** according to the general procedure to give a crude product. Then it was purified using silica gel chromatography with petroleum ether/EtOAc (30:1, v/v) as elution solvent to obtain the desired product **6j** as a colorless oil, yield 53.2%; IR (KBr)  $\nu$  3450, 2936, 2859, 2835, 1596, 1511, 1460, 1252, 1152, 1065, 834, 780, 693  $\text{cm}^{-1}$ ;  $^1\text{H}$  NMR (500 MHz,  $\text{DMSO-}d_6$ )  $\delta$  7.53 (d,  $J = 9.0$  Hz, 2H, Ar-H), 7.24-7.20 (m, 2H, Ar-H, CH=CH), 7.03 (d,  $J = 16.5$  Hz, 1H, CH=CH), 6.94 (d,  $J = 8.5$  Hz, 2H, Ar-H), 6.90-6.75 (br s, 2H, Ar-H), 6.81-6.78 (m,

1H, Ar-H), 6.76 (d,  $J = 2.0$  Hz, 2H, Ar-H), 6.41 (t,  $J = 2.0$  Hz, 1H, Ar-H), 3.97 (t,  $J = 6.5$  Hz, 2H, OCH<sub>2</sub>), 3.79 (s, 6H, OCH<sub>3</sub>), 3.74 (s, 3H, OCH<sub>3</sub>), 3.50 (s, 2H, Ph-CH<sub>2</sub>N), 2.48-2.43 (q,  $J = 7.0$  Hz, 2H, NCH<sub>2</sub>CH<sub>3</sub>), 2.39 (t,  $J = 7.0$  Hz, 2H, NCH<sub>2</sub>), 1.71-1.69 (m, 2H, alkyl chains-H), 1.46-1.33 (m, 6H, alkyl chains-H), 0.99 (t,  $J = 7.0$  Hz, 3H, CH<sub>2</sub>CH<sub>3</sub>); <sup>13</sup>C NMR (125 MHz, DMSO-*d*<sub>6</sub>):  $\delta$  161.17, 159.72, 159.00, 142.37, 139.97, 129.93, 129.50, 129.11, 128.30, 126.60, 121.09, 115.18, 114.36, 112.47, 104.72, 100.01, 67.98, 57.99, 55.69, 55.36, 53.00, 47.34, 29.18, 27.07, 26.98, 25.86, 12.18; Purity: 97.5% by HPLC ( $t_R$  14.2 min); MS (ESI)  $m/z$  504.5 [M+H]<sup>+</sup>; HRMS (ESI)  $m/z$  [M+H]<sup>+</sup> 504.3105 (calcd for C<sub>32</sub>H<sub>42</sub>NO<sub>4</sub>, 504.3108).

**(*E*)-6-(4-(3,5-Dimethoxystyryl)phenoxy)-*N*-ethyl-*N*-(4-methoxybenzyl)hexan-1-amine (6k)**

Intermediate **5k** was reacted with **3** according to the general procedure to give a crude product. Then it was purified using silica gel chromatography with petroleum ether/EtOAc (30:1, v/v) as elution solvent to obtain the desired product **6k** as a colorless oil, yield 43.2%; IR (KBr)  $\nu$  3446, 2936, 2858, 2836, 1596, 1512, 1461, 1250, 1204, 1153, 1066, 833 cm<sup>-1</sup>; <sup>1</sup>H NMR (500 MHz, DMSO-*d*<sub>6</sub>)  $\delta$  7.53 (d,  $J = 9.0$  Hz, 2H, Ar-H), 7.24-7.21 (m, 3H, Ar-H, CH=CH), 7.03 (d,  $J = 16.5$  Hz, 1H, CH=CH), 6.94 (d,  $J = 8.5$  Hz, 2H, Ar-H), 6.88-6.85 (m, 2H, Ar-H), 6.75 (d,  $J = 2.0$  Hz, 2H, Ar-H), 6.41 (t,  $J = 2.0$  Hz, 1H, Ar-H), 3.97 (t,  $J = 6.5$  Hz, 2H, OCH<sub>2</sub>), 3.80 (s, 6H, OCH<sub>3</sub>), 3.74 (s, 3H, OCH<sub>3</sub>), 3.45 (s, 2H, Ph-CH<sub>2</sub>N), 2.45-2.41 (q,  $J = 7.0$  Hz, 2H, NCH<sub>2</sub>CH<sub>3</sub>), 2.37 (t,  $J = 7.0$  Hz, 2H, NCH<sub>2</sub>), 1.71-1.69 (m, 2H, alkyl chains-H), 1.45-1.31 (m, 6H, alkyl chains-H), 0.98 (t,  $J = 7.0$  Hz, 3H, CH<sub>2</sub>CH<sub>3</sub>); <sup>13</sup>C NMR (125 MHz, DMSO-*d*<sub>6</sub>):

$\delta$  161.17, 159.00, 158.54, 139.97, 132.25, 130.08, 129.93, 129.11, 128.31, 126.60, 115.19, 113.94, 104.72, 100.01, 67.98, 57.28, 55.69, 55.46, 52.72, 47.04, 29.17, 27.04, 26.93, 25.83, 12.13; Purity: 98.2% by HPLC ( $t_R$  13.6 min); MS (ESI)  $m/z$  504.5 [M+H]<sup>+</sup>; HRMS (ESI)  $m/z$  [M+H]<sup>+</sup> 504.3105 (calcd for C<sub>32</sub>H<sub>42</sub>NO<sub>4</sub>, 504.3108). **(E)-6-**

**(4-(3,5-Dimethoxystyryl)phenoxy)-N-ethyl-N-(2-fluorobenzyl)hexan-1-amine (6l)**

Intermediate **5l** was reacted with **3** according to the general procedure to give a crude product. Then it was purified using silica gel chromatography with petroleum ether/EtOAc (30:1, v/v) as elution solvent to obtain the desired product **6l** as a colorless oil, yield 50.0%; IR (KBr)  $\nu$  3450, 2936, 2859, 1595, 1511, 1458, 1251, 1204, 1152, 1067, 833, 758 cm<sup>-1</sup>; <sup>1</sup>H NMR (500 MHz, DMSO-*d*<sub>6</sub>)  $\delta$  7.53 (d,  $J$  = 9.0 Hz, 2H, Ar-H), 7.46-7.42 (m, 1H, Ar-H), 7.32-7.27 (m, 1H, Ar-H), 7.20 (d,  $J$  = 16.0 Hz, 1H, CH=CH), 7.19-7.12 (m, 2H, Ar-H), 7.03 (d,  $J$  = 16.5 Hz, 1H, CH=CH), 6.94 (d,  $J$  = 8.5 Hz, 2H, Ar-H), 6.76 (d,  $J$  = 8.5 Hz, 2H, Ar-H), 6.41 (t,  $J$  = 2.0 Hz, 1H, Ar-H), 3.97 (t,  $J$  = 6.5 Hz, 2H, OCH<sub>2</sub>), 3.79 (s, 6H, OCH<sub>3</sub>), 3.58 (s, 2H, Ph-CH<sub>2</sub>N), 2.45-2.40 (q,  $J$  = 7.0 Hz, 2H, NCH<sub>2</sub>CH<sub>3</sub>), 2.41 (t,  $J$  = 7.0 Hz, 2H, NCH<sub>2</sub>), 1.73-1.67 (m, 2H, alkyl chains-H), 1.49-1.30 (m, 6H, alkyl chains-H), 1.00 (t,  $J$  = 7.0 Hz, 3H, CH<sub>2</sub>CH<sub>3</sub>); <sup>13</sup>C NMR (125 MHz, DMSO-*d*<sub>6</sub>):  $\delta$  162.22, 161.17, 160.28, 159.00, 139.97, 131.63, 131.59, 129.93, 129.11, 129.06, 128.30, 126.61, 124.53, 124.51, 115.18, 104.73, 100.01, 67.98, 55.59, 53.03, 50.61, 47.40, 29.16, 27.01, 25.82, 12.20; Purity: 97.9% by HPLC ( $t_R$  13.7 min); MS (ESI)  $m/z$  492.4 [M+H]<sup>+</sup>; HRMS (ESI)  $m/z$  [M+H]<sup>+</sup> 492.2912 (calcd for C<sub>31</sub>H<sub>39</sub>FNO<sub>3</sub>, 492.2908).

**(E)-6-(4-(3,5-Dimethoxystyryl)phenoxy)-N-ethyl-N-(2-fluorobenzyl)hexan-1-**

### **amine (6m)**

Intermediate **5m** was reacted with **3** according to the general procedure to give a crude product. Then it was purified using silica gel chromatography with petroleum ether/EtOAc (30:1, v/v) as elution solvent to obtain the desired product **6m** as a colorless oil, yield 51.1%; IR (KBr)  $\nu$  3444, 2935, 2859, 1594, 1511, 1458, 1251, 1204, 1152, 1066, 831, 782, 685  $\text{cm}^{-1}$ ;  $^1\text{H}$  NMR (500 MHz,  $\text{DMSO-}d_6$ )  $\delta$  7.53 (d,  $J = 9.0$  Hz, 2H, Ar-H), 7.37-7.33 (m, 1H, Ar-H), 7.22 (d,  $J = 16.0$  Hz, 1H, CH=CH), 7.17-7.12 (m, 2H, Ar-H), 7.07-7.01 (m, 2H, Ar-H, CH=CH), 6.94 (d,  $J = 8.5$  Hz, 2H, Ar-H), 6.76 (d,  $J = 2.5$  Hz, 2H, Ar-H), 6.41 (t,  $J = 2.0$  Hz, 1H, Ar-H), 3.97 (t,  $J = 6.5$  Hz, 2H,  $\text{OCH}_2$ ), 3.79 (s, 6H,  $\text{OCH}_3$ ), 3.55 (s, 2H, Ph- $\text{CH}_2\text{N}$ ), 2.45-2.40 (q,  $J = 7.0$  Hz, 2H,  $\text{NCH}_2\text{CH}_3$ ), 2.40 (t,  $J = 7.0$  Hz, 2H,  $\text{NCH}_2$ ), 1.74-1.67 (m, 2H, alkyl chains-H), 1.49-1.31 (m, 6H, alkyl chains-H), 0.99 (t,  $J = 7.0$  Hz, 3H,  $\text{CH}_2\text{CH}_3$ );  $^{13}\text{C}$  NMR (125 MHz,  $\text{DMSO-}d_6$ ):  $\delta$  163.72, 161.79, 161.17, 158.99, 139.97, 130.40, 130.33, 129.93, 129.10, 128.30, 126.60, 124.76, 124.74, 115.18, 104.72, 100.01, 67.98, 57.44, 55.68, 53.09, 47.04, 29.16, 27.03, 26.98, 25.84, 12.16; Purity: 98.4% by HPLC ( $t_R$  13.9 min); MS (ESI)  $m/z$  492.4  $[\text{M}+\text{H}]^+$ ; HRMS (ESI)  $m/z$   $[\text{M}+\text{H}]^+$  492.2912 (calcd for  $\text{C}_{31}\text{H}_{39}\text{FNO}_3$ , 492.2908).

### **(E)-6-(4-(3,5-Dimethoxystyryl)phenoxy)-N-ethyl-N-(4-fluorobenzyl)hexan-1-**

### **amine (6n)**

Intermediate **5n** was reacted with **3** according to the general procedure to give a crude product. Then it was purified using silica gel chromatography with petroleum ether/EtOAc (30:1, v/v) as elution solvent to obtain the desired product **6n** as a

colorless oil, yield 49.7%; IR (KBr)  $\nu$  3447, 2935, 2858, 1597, 1511, 1461, 1252, 1205, 1154, 1067, 833  $\text{cm}^{-1}$ ;  $^1\text{H}$  NMR (500 MHz,  $\text{DMSO-}d_6$ )  $\delta$  7.51 (d,  $J = 9.0$  Hz, 2H, Ar-H), 7.33-7.31 (dd,  $J = 6.0$  Hz, 2.0 Hz, 2H, Ar-H), 7.20 (d,  $J = 16.5$  Hz, 1H, CH=CH), 7.10 (t,  $J = 9.0$  Hz, 2H, Ar-H), 7.01 (d,  $J = 16.5$  Hz, 1H, CH=CH), 6.92 (d,  $J = 8.5$  Hz, 2H, Ar-H), 6.73 (d,  $J = 2.5$  Hz, 2H, Ar-H), 6.38 (t,  $J = 2.0$  Hz, 1H, Ar-H), 3.95 (t,  $J = 6.5$  Hz, 2H,  $\text{OCH}_2$ ), 3.77 (s, 6H,  $\text{OCH}_3$ ), 3.49 (s, 2H, Ph- $\text{CH}_2\text{N}$ ), 2.45-2.40 (q,  $J = 7.0$  Hz, 2H,  $\text{NCH}_2\text{CH}_3$ ), 2.36 (t,  $J = 7.0$  Hz, 2H,  $\text{NCH}_2$ ), 1.68-1.67 (m, 2H, alkyl chains-H), 1.42-1.30 (m, 6H, alkyl chains-H), 0.96 (t,  $J = 7.0$  Hz, 3H,  $\text{CH}_2\text{CH}_3$ );  $^{13}\text{C}$  NMR (125 MHz,  $\text{DMSO-}d_6$ ):  $\delta$  162.49, 161.16, 160.57, 158.98, 139.95, 136.71, 130.66, 130.60, 129.93, 129.09, 128.29, 126.60, 115.26, 115.18, 115.09, 104.72, 100.01, 67.98, 57.11, 55.68, 52.90, 47.19, 29.15, 27.03, 26.96, 25.84, 12.13; Purity: 98.9% by HPLC ( $t_{\text{R}}$  13.9 min); MS (ESI)  $m/z$  492.4  $[\text{M}+\text{H}]^+$ ; HRMS (ESI)  $m/z$   $[\text{M}+\text{H}]^+$  492.2912 (calcd for  $\text{C}_{31}\text{H}_{39}\text{FNO}_3$ , 492.2908).

**(*E*)-6-(4-(3,5-Dimethoxystyryl)phenoxy)-*N,N*-diethylhexan-1-amine (6o)**

Intermediate **5o** was reacted with **3** according to the general procedure to give a crude product. Then it was purified using silica gel chromatography with petroleum ether/acetone (9:1, v/v) as elution solvent to obtain the desired product **6o** as a light yellow oil, yield 45.4%; IR (KBr)  $\nu$  3455, 2936, 2838, 1597, 1512, 1462, 1251, 1205, 1153, 1065, 836  $\text{cm}^{-1}$ ;  $^1\text{H}$  NMR (500 MHz,  $\text{DMSO-}d_6$ )  $\delta$  7.53 (d,  $J = 8.5$  Hz, 2H, Ar-H), 7.22 (d,  $J = 16.5$  Hz, 1H, CH=CH), 7.03 (d,  $J = 16.5$  Hz, 1H, CH=CH), 6.95 (d,  $J = 8.5$  Hz, 2H, Ar-H), 6.75 (d,  $J = 2.0$  Hz, 2H, Ar-H), 6.47 (t,  $J = 2.0$  Hz, 1H, Ar-H), 4.00 (t,  $J = 6.5$  Hz, 2H,  $\text{OCH}_2$ ), 3.79 (s, 6H,  $\text{OCH}_3$ ), 2.49-2.40 (br s, 6H,  $\text{NCH}_2$ ), 1.75-

1.71 (m, 2H, alkyl chains-H), 1.45-1.33 (m, 6H, alkyl chains-H), 0.97 (t,  $J = 7.5$  Hz, 6H, CH<sub>3</sub>); <sup>13</sup>C NMR (125 MHz, DMSO-*d*<sub>6</sub>):  $\delta$  161.17, 159.00, 139.97, 129.94, 129.10, 128.31, 126.61, 115.20, 104.72, 100.01, 67.99, 61.88, 55.68, 46.84, 29.19, 27.16, 25.92, 16.71; Purity: 98.9% by HPLC ( $t_R$  11.1 min); MS (ESI)  $m/z$  412.4 [M+H]<sup>+</sup>; HRMS (ESI)  $m/z$  412.2847 [M+H]<sup>+</sup> (calcd for C<sub>26</sub>H<sub>38</sub>NO<sub>3</sub>, 384.2546).

**(*E*)-6-(4-(3,5-Dimethoxystyryl)phenoxy)-*N,N*-dimethylhexan-1-amine (6p)**

Intermediate **5p** was reacted with **3** according to the general procedure to give a crude product. Then it was purified using silica gel chromatography with petroleum ether/acetone (8:1, v/v) as elution solvent to obtain the desired product **6p** as a colorless oil, yield 51.0%; IR (KBr)  $\nu$  3450, 2933, 2856, 1597, 1512, 1462, 1384, 1251, 1205, 1154, 1066, 836, 683 cm<sup>-1</sup>; <sup>1</sup>H NMR (500 MHz, DMSO-*d*<sub>6</sub>)  $\delta$  7.53 (d,  $J = 8.5$  Hz, 2H, Ar-H), 7.22 (d,  $J = 16.0$  Hz, 1H, CH=CH), 7.03 (d,  $J = 16.0$  Hz, 1H, CH=CH), 6.95 (d,  $J = 8.5$  Hz, 2H, Ar-H), 6.75 (d,  $J = 1.5$  Hz, 2H, Ar-H), 6.40 (d,  $J = 2.0$  Hz, 1H, Ar-H), 4.00 (t,  $J = 6.5$  Hz, 2H, OCH<sub>2</sub>), 3.80 (s, 6H, OCH<sub>3</sub>), 2.20 (t,  $J = 7.0$  Hz, 2H, NCH<sub>2</sub>), 2.12 (s, 6H, NCH<sub>3</sub>), 1.77-1.68 (m, 2H, alkyl chains-H), 1.48-1.31 (m, 6H, alkyl chains-H); <sup>13</sup>C NMR (125 MHz, DMSO-*d*<sub>6</sub>):  $\delta$  161.17, 159.01, 139.97, 129.94, 129.11, 128.31, 126.61, 115.21, 104.72, 100.02, 68.00, 59.57, 55.69, 45.66, 29.19, 27.48, 27.11, 25.94; Purity: 99.1% by HPLC ( $t_R$  10.7 min); MS (ESI)  $m/z$  384.4 [M+H]<sup>+</sup>; HRMS (ESI)  $m/z$  384.2531 [M+H]<sup>+</sup> (calcd for C<sub>24</sub>H<sub>34</sub>NO<sub>3</sub>, 384.2533).

**(*E*)-6-(4-(3,5-Dimethoxystyryl)phenoxy)-*N,N*-dipropylhexan-1-amine (6q)**

Intermediate **5q** was reacted with **3** according to the general procedure to give a crude product. Then it was purified using silica gel chromatography with petroleum

ether/acetone (15:1, v/v) as elution solvent to obtain the desired product **6q** as a light yellow oil, yield 50.1%; IR (KBr)  $\nu$  3444, 2934, 2870, 1597, 1512, 1462, 1250, 1204, 1153, 1069, 835  $\text{cm}^{-1}$ ;  $^1\text{H}$  NMR (500 MHz,  $\text{DMSO-}d_6$ )  $\delta$  7.53 (d,  $J = 8.5$  Hz, 2H, Ar-H), 7.22 (d,  $J = 16.5$  Hz, 1H, CH=CH), 7.03 (d,  $J = 16.5$  Hz, 1H, CH=CH), 6.95 (d,  $J = 8.5$  Hz, 2H, Ar-H), 6.75 (d,  $J = 2.0$  Hz, 2H, Ar-H), 6.40 (t,  $J = 2.0$  Hz, 1H, Ar-H), 4.00 (t,  $J = 6.5$  Hz, 2H,  $\text{OCH}_2$ ), 3.79 (s, 6H,  $\text{OCH}_3$ ), 2.33 (br s, 6H,  $\text{NCH}_2$ ), 1.73-1.71 (m, 2H, alkyl chains-H), 1.45-1.35 (m, 10H, alkyl chains-H,  $\text{CH}_2\text{CH}_3$ ), 0.85 (t,  $J = 7.5$  Hz, 6H,  $\text{CH}_2\text{CH}_3$ );  $^{13}\text{C}$  NMR (125 MHz,  $\text{DMSO-}d_6$ ):  $\delta$  161.17, 159.00, 139.96, 129.93, 129.10, 128.30, 126.60, 115.18, 104.72, 100.01, 67.97, 56.06, 55.68, 53.95, 29.19, 27.08, 25.91, 20.43, 20.34, 12.26; Purity: 99.0% by HPLC ( $t_R$  12.8 min); MS (ESI)  $m/z$  440.4  $[\text{M}+\text{H}]^+$ ; HRMS (ESI)  $m/z$  440.3160  $[\text{M}+\text{H}]^+$  (calcd for  $\text{C}_{28}\text{H}_{42}\text{NO}_3$ , 440.3159).

**(E)-1-(6-(4-(3,5-Dimethoxystyryl)phenoxy)hexyl)pyrrolidine (6r)**

Intermediate **5r** was reacted with **3** according to the general procedure to give a crude product. Then it was purified using silica gel chromatography with petroleum ether/acetone (5:1, v/v) as elution solvent to obtain the desired product **6r** as a dark yellow oil, yield 47.7%; IR (KBr)  $\nu$  3444, 2935, 2858, 1596, 1512, 1460, 1251, 1204, 1153, 1067, 836, 685  $\text{cm}^{-1}$ ;  $^1\text{H}$  NMR (500 MHz,  $\text{DMSO-}d_6$ )  $\delta$  7.53 (d,  $J = 8.5$  Hz, 2H, Ar-H), 7.22 (d,  $J = 16.5$  Hz, 1H, CH=CH), 7.03 (d,  $J = 16.5$  Hz, 1H, CH=CH), 6.95 (d,  $J = 8.5$  Hz, 2H, Ar-H), 6.75 (d,  $J = 2.0$  Hz, 2H, Ar-H), 6.40 (t,  $J = 2.0$  Hz, 1H, Ar-H), 4.00 (t,  $J = 6.5$  Hz, 2H,  $\text{OCH}_2$ ), 3.79 (s, 6H,  $\text{OCH}_3$ ), 2.41-2.36 (m, 6H,  $\text{NCH}_2$ ), 1.76-1.67 (m, 6H, alkyl chains-H,  $\text{CH}_2\text{CH}_2$ ), 1.48-1.35 (m, 6H, alkyl chains-H);  $^{13}\text{C}$  NMR

(125 MHz, DMSO-*d*<sub>6</sub>):  $\delta$  161.20, 159.01, 139.97, 129.94, 129.11, 128.31, 126.61, 115.21, 104.72, 100.01, 68.01, 56.15, 55.69, 54.09, 29.17, 28.86, 27.30, 25.97, 23.58; Purity: 98.7% by HPLC ( $t_R$  11.0 min); MS (ESI)  $m/z$  410.4 [M+H]<sup>+</sup>; HRMS (ESI)  $m/z$  410.2692 [M+H]<sup>+</sup> (calcd for C<sub>26</sub>H<sub>36</sub>NO<sub>3</sub>, 410.2690).

**(*E*)-1-(6-(4-(3,5-Dimethoxystyryl)phenoxy)hexyl)piperidine (6s)**

Intermediate **5s** was reacted with **3** according to the general procedure to give a crude product. Then it was purified using silica gel chromatography with petroleum ether/acetone (8:1, v/v) as elution solvent to obtain the desired product **6s** as a dark yellow oil, yield 46.0%; IR (KBr)  $\nu$  3449, 2920, 2851, 1600, 1512, 1464, 1385, 1251, 1205, 1155, 1065, 839, 690 cm<sup>-1</sup>; <sup>1</sup>H NMR (500 MHz, DMSO-*d*<sub>6</sub>)  $\delta$  7.53 (d,  $J$  = 8.5 Hz, 2H, Ar-H), 7.22 (d,  $J$  = 16.5 Hz, 1H, CH=CH), 7.03 (d,  $J$  = 16.5 Hz, 1H, CH=CH), 6.95 (d,  $J$  = 8.5 Hz, 2H, Ar-H), 6.75 (d,  $J$  = 2.0 Hz, 2H, Ar-H), 6.40 (t,  $J$  = 2.0 Hz, 1H, Ar-H), 3.99 (t,  $J$  = 6.5 Hz, 2H, OCH<sub>2</sub>), 3.79 (s, 6H, OCH<sub>3</sub>), 2.32-2.22 (m, 6H, NCH<sub>2</sub>), 1.76-1.70 (m, 2H, alkyl chains-H), 1.52-1.31 (m, 12H, alkyl chains-H, CH<sub>2</sub>CH<sub>2</sub>CH<sub>2</sub>); <sup>13</sup>C NMR (125 MHz, DMSO-*d*<sub>6</sub>):  $\delta$  161.17, 159.01, 139.97, 129.93, 129.11, 128.31, 126.61, 115.21, 104.72, 100.01, 68.00, 59.06, 55.69, 54.57, 29.16, 27.26, 26.80, 26.06, 25.96, 24.66; Purity: 97.9% by HPLC ( $t_R$  6.2 min); MS (ESI)  $m/z$  424.4 [M+H]<sup>+</sup>; HRMS (ESI)  $m/z$  424.2844 [M+H]<sup>+</sup> (calcd for C<sub>27</sub>H<sub>38</sub>NO<sub>3</sub>, 424.2846).

**(*E*)-1-(6-(4-(3,5-Dimethoxystyryl)phenoxy)hexyl)-2-methylpiperidine (6t)**

Intermediate **5t** was reacted with **3** according to the general procedure to give a crude product. Then it was purified using silica gel chromatography with petroleum ether/acetone (6:1, v/v) as elution solvent to obtain the desired product **6t** as a dark

yellow oil, yield 49.0%; IR (KBr)  $\nu$  3451, 2919, 2851, 1637, 1511, 1460, 1384, 1261, 1153, 1095, 802  $\text{cm}^{-1}$ ;  $^1\text{H}$  NMR (500 MHz,  $\text{DMSO-}d_6$ )  $\delta$  7.53 (d,  $J$  = 8.5 Hz, 2H, Ar-H), 7.22 (d,  $J$  = 16.5 Hz, 1H, CH=CH), 7.03 (d,  $J$  = 16.5 Hz, 1H, CH=CH), 6.94 (d,  $J$  = 9.0 Hz, 2H, Ar-H), 6.75 (d,  $J$  = 2.0 Hz, 2H, Ar-H), 6.41 (t,  $J$  = 2.0 Hz, 1H, Ar-H), 4.00 (t,  $J$  = 6.5 Hz, 2H,  $\text{OCH}_2$ ), 3.79 (s, 6H,  $\text{OCH}_3$ ), 2.78-2.76 (m, 1H, NCH), 2.63-2.57 (m, 1H, NCH), 2.23 (br s, 2H,  $\text{NCH}_2$ ), 2.07 (br s, 1H, NCH), 1.75-1.72 (m, 2H, alkyl chains-H), 1.57-1.18 (m, 12H, alkyl chains-H,  $\text{CH}_2\text{CH}_2\text{CH}_2$ ), 1.00 (t,  $J$  = 3.0 Hz, 3H,  $\text{CHCH}_3$ );  $^{13}\text{C}$  NMR (125 MHz,  $\text{DMSO-}d_6$ ):  $\delta$  161.17, 159.00, 139.97, 129.93, 129.11, 128.31, 126.61, 115.20, 104.72, 100.01, 68.00, 55.74, 55.69, 55.72, 51.85, 34.66, 29.19, 27.29, 26.27, 25.94, 25.86, 23.94, 18.97; Purity: 99.2% by HPLC ( $t_{\text{R}}$  6.3 min); MS (ESI)  $m/z$  438.4  $[\text{M}+\text{H}]^+$ ; HRMS (ESI)  $m/z$  438.3005  $[\text{M}+\text{H}]^+$  (calcd for  $\text{C}_{28}\text{H}_{40}\text{NO}_3$ , 438.3003).

**(*E*)-1-(6-(4-(3,5-Dimethoxystyryl)phenoxy)hexyl)piperidin-4-ol (6u)**

Intermediate **5u** was reacted with **3** according to the general procedure to give a crude product. Then it was purified using silica gel chromatography with  $\text{CH}_2\text{Cl}_2/\text{MeOH}$  (20:1, v/v) as elution solvent to obtain the desired product **6u** as a colorless oil, yield 44.7%; IR (KBr)  $\nu$  3424, 2936, 2865, 1685, 1596, 1512, 1462, 1320, 1253, 1162, 1069, 836, 798, 684  $\text{cm}^{-1}$ ;  $^1\text{H}$  NMR (500 MHz,  $\text{DMSO-}d_6$ )  $\delta$  7.53 (d,  $J$  = 8.5 Hz, 2H, Ar-H), 7.22 (d,  $J$  = 16.5 Hz, 1H, CH=CH), 7.03 (d,  $J$  = 16.5 Hz, 1H, CH=CH), 6.95 (d,  $J$  = 8.5 Hz, 2H, Ar-H), 6.75 (d,  $J$  = 2.0 Hz, 2H, Ar-H), 6.41 (t,  $J$  = 2.0 Hz, 1H, Ar-H), 4.52 (d,  $J$  = 3.5 Hz, 1H, OH), 4.00 (t,  $J$  = 6.5 Hz, 2H,  $\text{OCH}_2$ ), 3.79 (s, 6H,  $\text{OCH}_3$ ), 3.43 (br s, 1H, CHOH), 2.69 (m, 2H,  $\text{NCH}_2$ ), 2.25 (br s, 2H,  $\text{NCH}_2$ ), 1.98 (br s, 2H,

NCH<sub>2</sub>), 1.75-1.70 (m, 4H, alkyl chains-H, CH<sub>2</sub>CH<sub>2</sub>), 1.47-1.31 (m, 8H, alkyl chains-H, CH<sub>2</sub>CH<sub>2</sub>); <sup>13</sup>C NMR (125 MHz, DMSO-*d*<sub>6</sub>): δ 161.17, 159.01, 139.97, 129.94, 129.11, 128.31, 126.61, 115.21, 104.73, 100.02, 68.01, 58.31, 55.69, 51.56, 34.93, 29.16, 27.25, 27.08, 25.94; Purity: 98.1% by HPLC (0-20 min, H<sub>2</sub>O (t<sub>R</sub> 10.6 min)); MS (ESI) *m/z* 440.4 [M+H]<sup>+</sup>; HRMS (ESI) *m/z* 440.2796 [M+H]<sup>+</sup> (calcd for C<sub>27</sub>H<sub>38</sub>NO<sub>4</sub>, 440.2795).

**(*E*)-4-(6-(4-(3,5-Dimethoxystyryl)phenoxy)hexyl)morpholine (6v)**

Intermediate **5v** was reacted with **3** according to the general procedure to give a crude product. Then it was purified using silica gel chromatography with petroleum ether/acetone (10:1, v/v) as elution solvent to obtain the desired product **6v** as a light yellow oil, yield 48.2%; IR (KBr) ν 3457, 2937, 2858, 1597, 1512, 1462, 1251, 1205, 1154, 1064, 836, 686 cm<sup>-1</sup>; <sup>1</sup>H NMR (500 MHz, DMSO-*d*<sub>6</sub>) δ 7.53 (d, *J* = 8.5 Hz, 2H, Ar-H), 7.22 (d, *J* = 16.0 Hz, 1H, CH=CH), 7.03 (d, *J* = 16.0 Hz, 1H, CH=CH), 6.95 (d, *J* = 8.5 Hz, 2H, Ar-H), 6.75 (d, *J* = 2.0 Hz, 2H, Ar-H), 6.41 (t, *J* = 2.0 Hz, 1H, Ar-H), 4.00 (t, *J* = 6.5 Hz, 2H, OCH<sub>2</sub>), 3.79 (s, 6H, OCH<sub>3</sub>), 3.57 (t, *J* = 3.5 Hz, 4H, OCH<sub>2</sub>), 2.34 (br s, 4H, NCH<sub>2</sub>), 2.27 (t, *J* = 7.0 Hz, 2H, NCH<sub>2</sub>), 1.76-1.70 (m, 2H, alkyl chains-H), 1.49-1.41 (m, 4H, alkyl chains-H), 1.38-1.31 (m, 2H, alkyl chains-H); <sup>13</sup>C NMR (125 MHz, DMSO-*d*<sub>6</sub>): δ 161.17, 158.00, 139.96, 129.94, 129.10, 128.31, 126.61, 115.21, 104.72, 100.01, 67.99, 66.71, 58.74, 55.69, 53.90, 29.15, 27.13, 26.38, 25.93; Purity: 98.2% by HPLC (t<sub>R</sub> 9.8 min); MS (ESI) *m/z* 426.3 [M+H]<sup>+</sup>; HRMS (ESI) *m/z* 426.2640 [M+H]<sup>+</sup> (calcd for C<sub>26</sub>H<sub>36</sub>NO<sub>4</sub>, 426.2639).

***In vitro* inhibition of AChE and BuChE**

Acetylcholinesterase (AChE, E.C. 3.1.1.7, from the electric eel), butyrylcholinesterase (BuChE, E.C. 3.1.1.8, from equine serum), 5,5'-dithiobis-(2-nitrobenzoic acid) (Ellman's reagent, DTNB), acetylthiocholine chloride (ATC), and butylthiocholine chloride (BTC) were purchased from Sigma-Aldrich. The capacity of the test compounds to inhibit AChE and BuChE activities was assessed by Ellman's method. Test compounds were dissolved in a minimum volume of DMSO (1%) and were diluted using the buffer solution (50 mM Tris-HCl, pH = 8.0, 0.1 M NaCl, 0.02 M MgCl<sub>2</sub>·6H<sub>2</sub>O) to the final concentration. In 96-well plates, 160 μL of 1.5 mM DTNB and 50 μL of AChE (0.22 U/mL prepared in 50 mM Tris-HCl, pH = 8.0, 0.1% w/v bovine serum albumin (BSA)) or 50 μL of BuChE (0.12 U/mL prepared in 50 mM Tris-HCl, pH = 8.0, 0.1% w/v BSA) were incubated with 10 μL of various concentrations of test compounds (0.001–100 μM) at 37 °C for 6 min followed by the addition of 30 μL acetylthiocholine iodide (15 mM) or S-butyrylthiocholine iodide (15mM) and the absorbance was measured at different time intervals (0, 60, 120, and 180 s) at a wavelength of 405 nm. The concentration of compound producing 50% of enzyme activity inhibition (IC<sub>50</sub>) was calculated by nonlinear regression analysis of the response-concentration (log) curve, using a Specta Max Plus 384 multidetection microplate reader (Molecular Devices, Sunnyvale, CA). Calculations were performed according to the method of Ellman *et al.* Results are expressed as the mean ± SEM of at least three different experiments performed in triplicate.

### **Kinetic characterization of AChE inhibition**

To obtain the mechanism of action of **6h**, reciprocal plots of 1/velocity versus

$1/[\text{substrate}]$  were constructed at different concentrations of the substrate thiocholine iodide (0.05–0.5 mM) by using Ellman's method. Compound **6h** was added to the assay solution and pre-incubated with the enzyme at 37 °C for 15 min, followed by the addition of ATC. The assay solution (200  $\mu\text{L}$ ) containing compound **6h** (0.40, 0.80, 1.60  $\mu\text{M}$ ), DTNB (1.5 mM), 10  $\mu\text{L}$  AChE and ATCI (0.05, 0.075, 0.1, 0.15, 0.2, 0.5 mM) was dissolved in 0.1 M  $\text{KH}_2\text{PO}_4/\text{K}_2\text{HPO}_4$  buffer (pH 8.0). Kinetic characterization of the hydrolysis of acetylthiocholine catalyzed by AChE was done spectrometrically at 405 nm. A parallel control experiment was carried out without compound **6h** in the mixture. Slopes of these reciprocal plots were then plotted against the concentration of **6h** in a weighted analysis and  $K_i$  was determined as the intercept on the negative x-axis. Data analysis was performed with GraphPad Prism 4.03 software (GraphPad Software Inc.).

### **Molecular docking study**

All calculations and analyses were carried out with Molecular Operating Environment (MOE) program (Chemical Computing Group, Montreal, Canada). The X-ray crystal structure of the AChE complex with bis(7)-tacrine (PDB ID: 2CKM) was applied to build the starting model of AChE, which was obtained from the Protein Data Bank ([www.rcsb.org](http://www.rcsb.org)). Heteroatoms and water molecules in the PDB files were removed and all hydrogen atoms were subsequently added to the proteins. Compound **6h** was drawn in MOE. The compound was then protonated using the protonate 3D protocol and energy was minimized using the MMFF94x force field in MOE. After the enzymes and compound **6h** were ready for the docking study, **6h** was docked into the

active site of the protein by the “Triangle Matcher” method. The Dock scoring in MOE software was done using ASE scoring function and Forcefield was selected as the refinement method. The best 10 poses of molecules were retained and scored. After docking, the geometry of resulting complex was studied using the MOE’s pose viewer utility.

### **Inhibition of $A\beta_{42}$ self-induced aggregation**

Inhibition of  $A\beta_{42}$  aggregation was measured using a Thioflavin T(ThT)-binding assay. Resveratrol and curcumin were used as reference compounds. HFIP pretreated  $A\beta_{42}$  samples (Anaspec Inc) were resolubilized with a 50 mM phosphate buffer (pH 7.4) to give a 25  $\mu$ M solution. Each test compound was firstly prepared in DMSO at a concentration of 10 mM and then 1  $\mu$ L of each was added to the well of black, opaque Corning 96-well plates such that the final solvent concentration was 10%. The final concentration of each compound was 20  $\mu$ M, which was prepared in independent triplicates. The solvent control was also included. Then, 9  $\mu$ L of 25  $\mu$ M  $A\beta_{42}$  sample was added to each well and the samples mixed by gentle trapping. Plates were covered to minimize evaporation and incubated in dark at room temperature for 46-48 h with no agitation. After the incubation period, 200  $\mu$ L of 5  $\mu$ M ThT in 50 mM glycine-NaOH buffer (pH 8.0) was added to each well. Fluorescence was measured on a SpectraMax M5 multi-mode plate reader (Molecular Devices, Sunnyvale, CA, USA) with excitation and emission wavelengths of 446 nm and 490 nm, respectively. The fluorescence intensities were compared and the percent inhibition due to the presence of the inhibitor was calculated by the following formula:  $100 - (IF_i/IF_o \times$

100), where IF<sub>i</sub> and IF<sub>o</sub> are the fluorescence intensities obtained for A $\beta$  plus AChE in the presence and in the absence of inhibitor, respectively, minus the fluorescence intensities due to the respective blanks.

### ***In vitro* inhibition of Monoamine oxidase**

Human MAO-A and MAO-B were purchased from Sigma-Aldrich. The capacity of the test compounds to inhibit MAO-A and MAO-B activities was assessed by Amplex Red MAO assay. Briefly, 0.1 mL of sodium phosphate buffer (0.05 M, pH 7.4) containing the test drugs at various concentrations and adequate amounts of recombinant hMAO-A or hMAO-B required and adjusted to obtain in our experimental conditions the same reaction velocity, i.e., to oxidize (in the control group) the same concentration of substrate: 165 pmol of *p*-tyramine/min (hMAO-A: 1.1  $\mu$ g protein; specific activity: 150nmol of *p*-tyramine oxidized to *p*-hydroxyphenylacetaldehyde/min/mg protein; hMAO-B: 7.5  $\mu$ g protein; specific activity: 22 nmol of *p*-tyramine transformed/min/mg protein) were incubated for 15 min at 37 °C in a flat-black-bottom 96-well microtest plate placed in a dark fluorimeter chamber. After this incubation period, the reaction was started by adding 200  $\mu$ M (final concentrations) Amplex Red reagent, 1 U/mL horseradish peroxidase, and 1 mM *p*-tyramine. The production of H<sub>2</sub>O<sub>2</sub> and consequently, of resorufin, was quantified at 37 °C in a SpectraMax Paradigm (Molecular Devices, Sunnyvale, CA) multi-mode detection platform reader based on the fluorescence generated (excitation, 545 nm; emission, 590 nm). The specific fluorescence emission was calculated after subtraction of the background activity. The background activity was determined from

wells containing all components except the hMAO isoforms, which were replaced by a sodium phosphate buffer solution (0.05 M, pH 7.4). The percent inhibition was calculated by the following expression:  $(1 - IF_i/IF_c) \times 100$  in which  $IF_i$  and  $IF_c$  are the fluorescence intensities obtained for hMAO in the presence and absence of inhibitors after subtracting the respective background.

### **SH-SY5Y neuroblastoma cell toxicity**

The toxicity effect of test compound on the human neuro-blastoma cell line SH-SY5Y cells was examined according to the previous methods. The SH-SY5Y cells were cultured in Eagle's minimum essential medium (EMEM)/ham's F-12 (1:1) medium supplemented with 10% fetal bovine serum (FBS), 100 U/mL penicillin and 100  $\mu$ g/mL streptomycin, at 37 °C in a humidified atmosphere containing 5% CO<sub>2</sub>. Cells were subcultured in 96-well plates at a seeding density of 10,000 cells per well and allowed to adhere and grow. When cells reached the required confluence, they were placed into serum-free medium and treated with compound **6r**. Twenty-four hours later the survival of cells was determined by MTT assay. Briefly, after incubation with 20  $\mu$ L of MTT at 37 °C for 4 h, living cells containing MTT formazan crystals were solubilized in 200  $\mu$ L DMSO. The absorbance of each well was measured using a microculture plate reader with a test wavelength of 570 nm and a reference wavelength of 630 nm. Results are expressed as the mean  $\pm$  SD of three independent experiments.
